# Supplementary material for: Could the erythrocyte indices or serum ferritin predict the therapeutic response to a trial with oral iron during pregnancy? Results from the Accuracy study for Maternal Anaemia diagnosis (AMA)
Source: Springer Nature journal article supplement (doi:10.1186/s12884-016-1005-x), 2016-08-11

## ALGORITHM OF INCLUSION AND FOLLOW-UP PROCEDURES OF WOMEN IN THE AMA STUDY

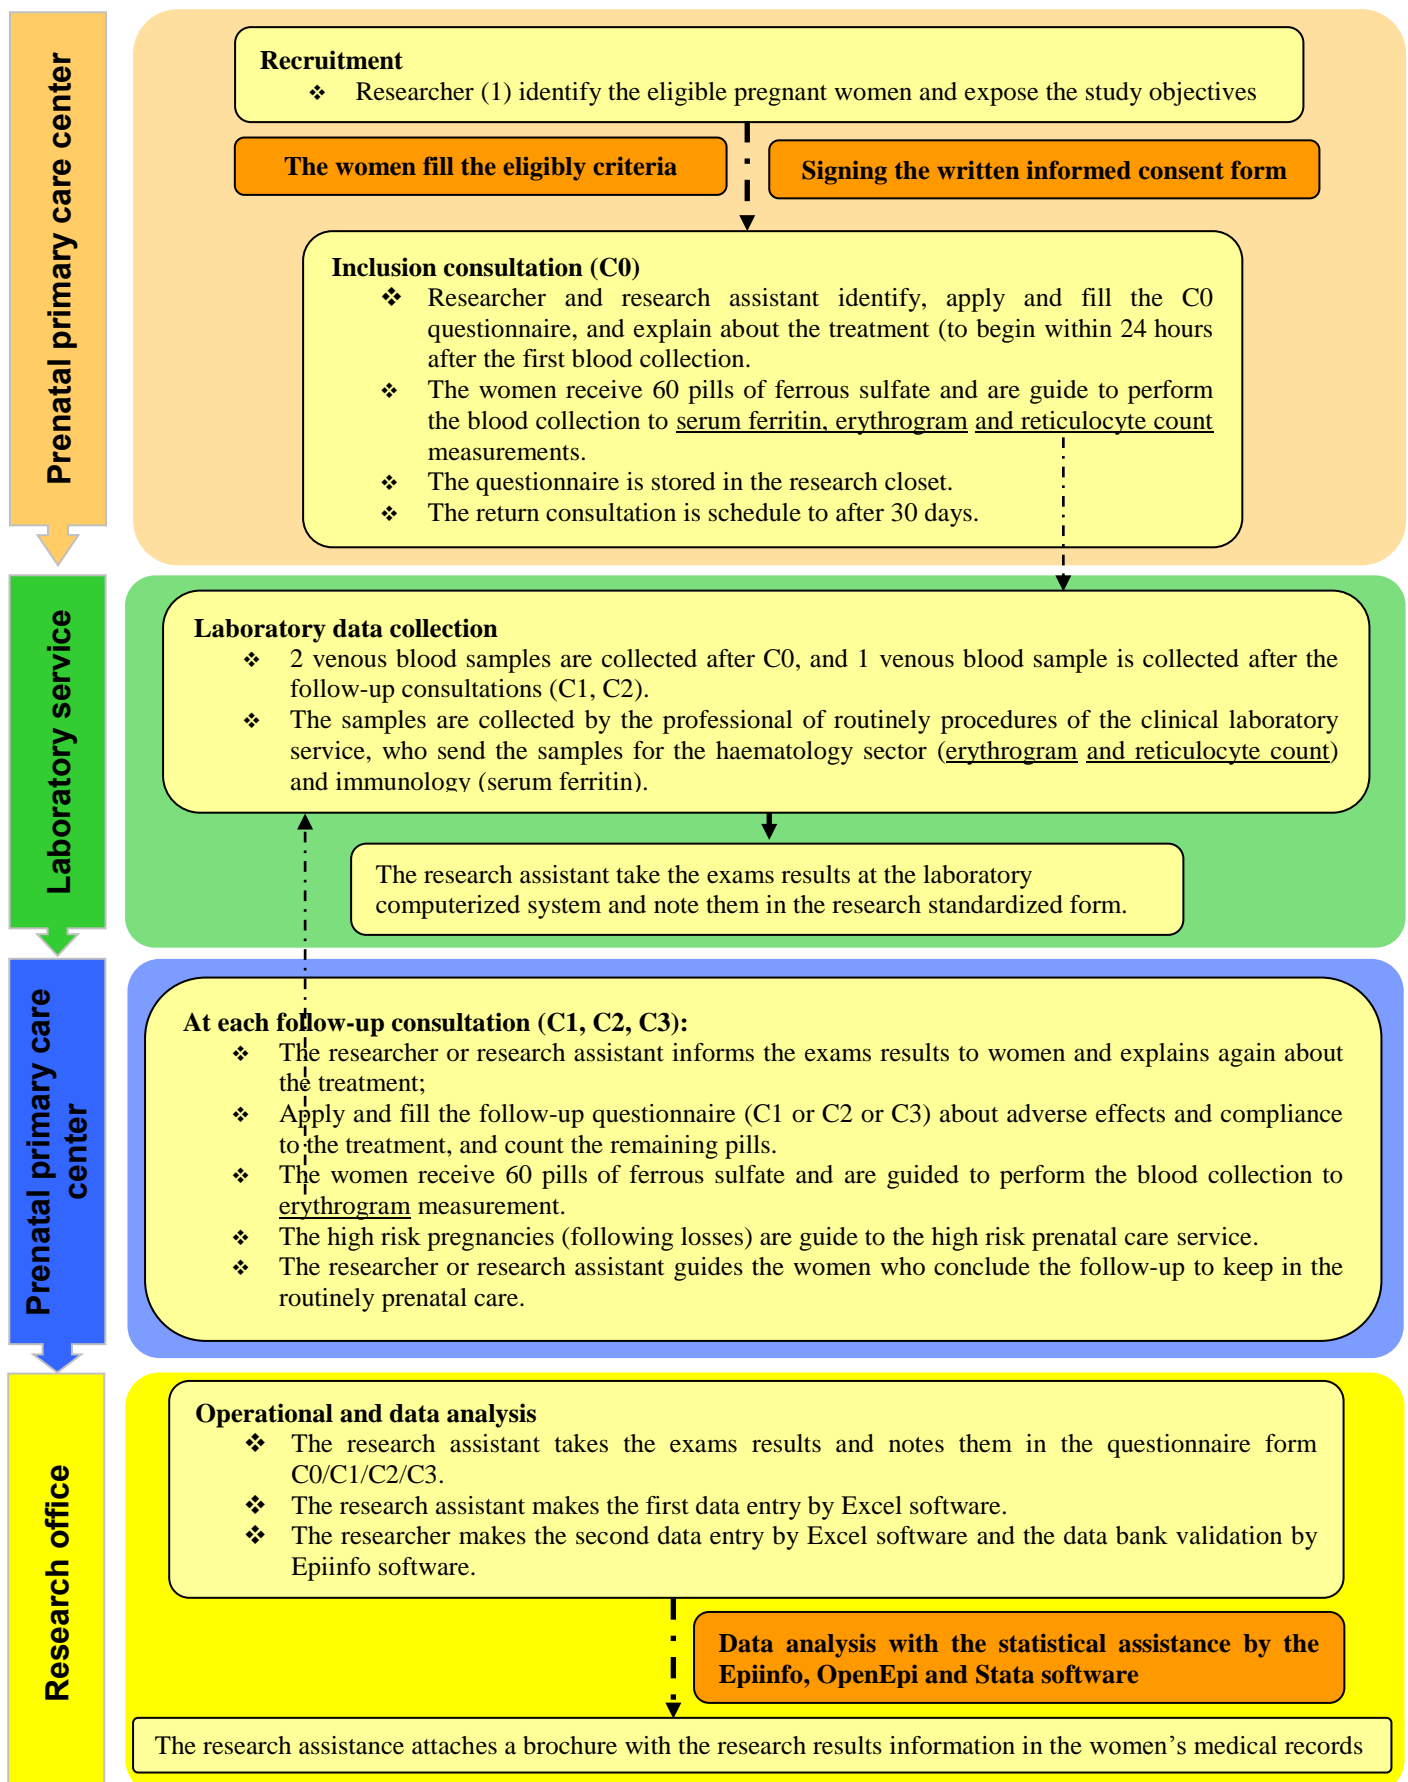

Supplement: MOESM2 [file 10581186]
