# Supplementary material for: Could the erythrocyte indices or serum ferritin predict the therapeutic response to a trial with oral iron during pregnancy? Results from the Accuracy study for Maternal Anaemia diagnosis (AMA)
Source: Springer Nature journal article supplement (doi:10.1186/s12884-016-1005-x), 2016-08-11
Supplement: MOESM3 [file 10581186]

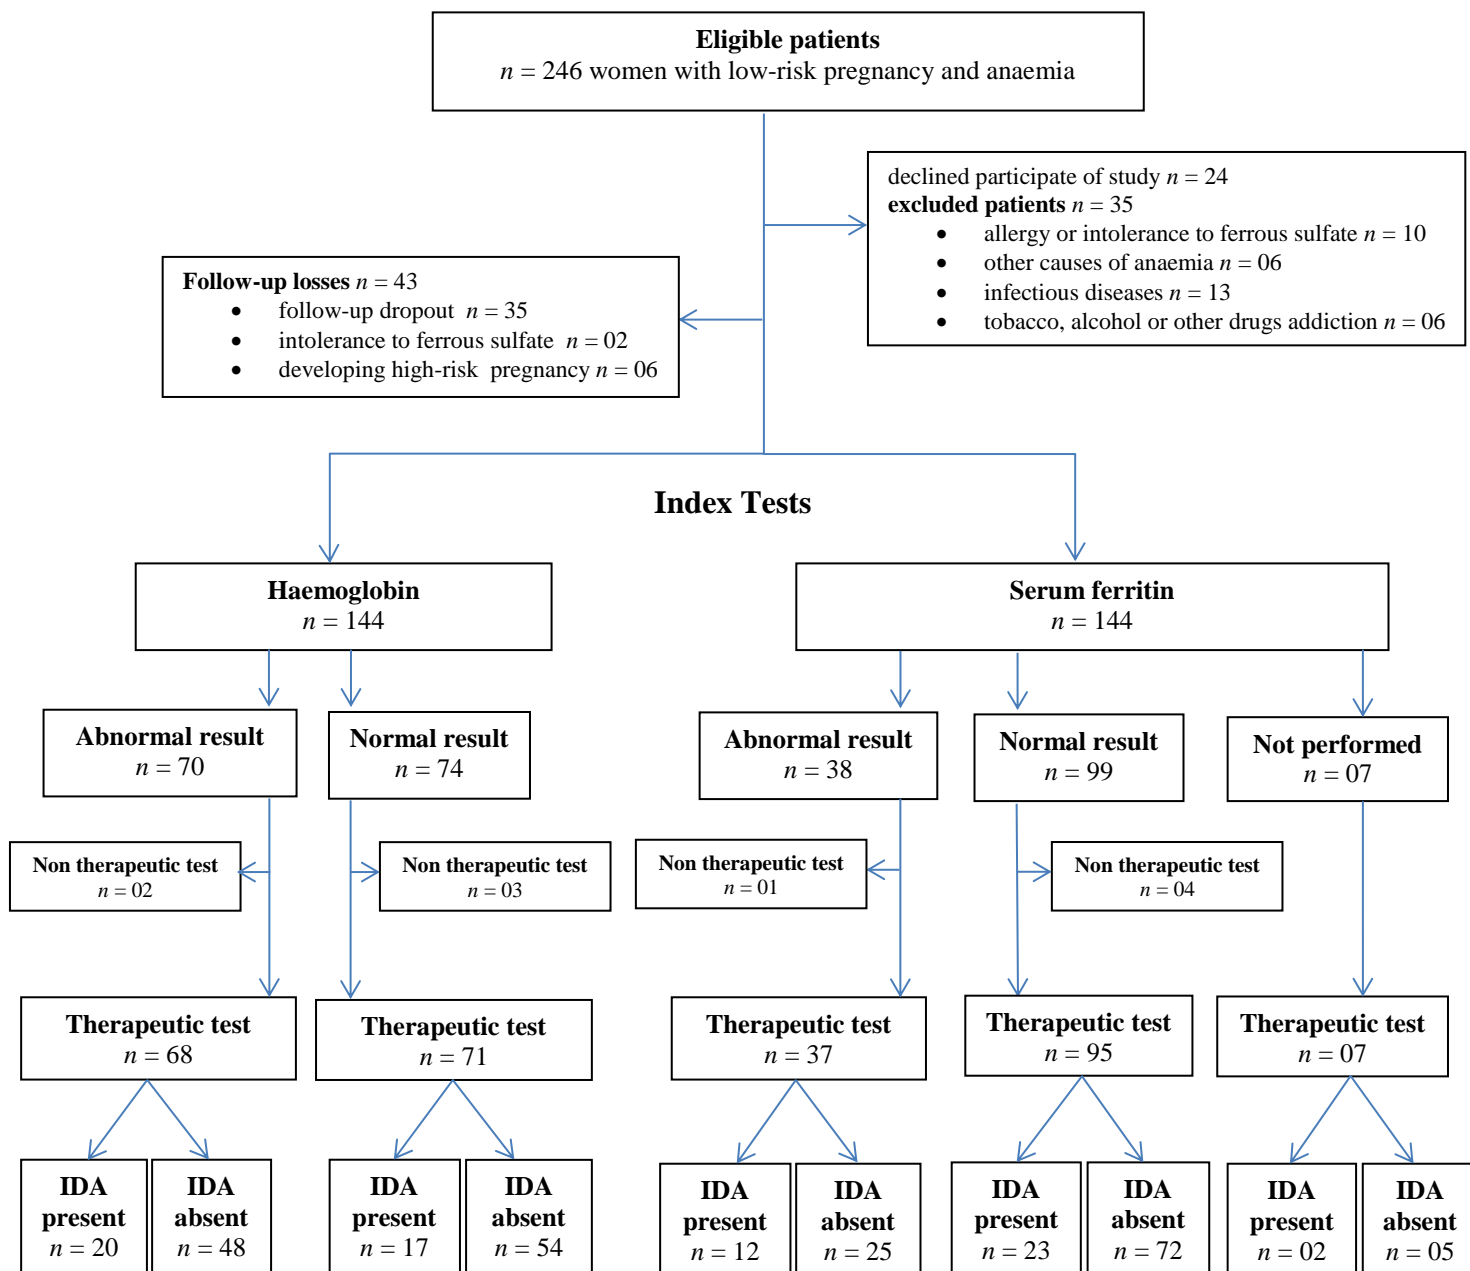

**Flow diagram** - inclusions, losses and failures to undergo index-tests (haemoglobin and serum ferritin) and reference standard test (*therapeutic test with oral iron*) for iron deficiency anaemia (IDA), among 144 pregnant women recruited and followed between August 2011 and December 2012.
